# Supplementary material
Source: HighWire-hosted journal article supplement (https://www.cmajopen.ca/highwire/filestream/84946/field_highwire_adjunct_files/3/2020-0018-original-submission.pdf)
Supplement: 2020-0018-original-submission.pdf [file 2020-0018-original-submission.pdf]

1  
2  
3 Exploring Métis health, spirituality, and wellbeing: A patient-oriented community-based pilot  
4  
5  
6 study with the Métis Nation of Alberta – Region 3  
7

8 Carla S. Ginn, RN, PhD  
9 Faculty of Nursing, University of Calgary  
10 2500 University Dr. N.W  
11 Calgary, Alberta T2N 1N4  
12 Email: [cginn@ucalgary.ca](mailto:cginn@ucalgary.ca)  
13 Telephone: 403-220-4440  
14 Fax: 403-284-4803  
15 ORCID 0000-0002-8343-1388  
16 Corresponding author  
17  
18

19 Craig W. C. Ginn, BA, MA, PhD  
20 Department of Classics and Religion, University of Calgary  
21 2500 University Dr. N.W  
22 Calgary, Alberta T2N 1N4  
23 Email: [cwcginn@ucalgary.ca](mailto:cwcginn@ucalgary.ca)  
24 Telephone: 403-220-5886  
25  
26

27 Lawrence Gervais  
28 Regional President  
29 Métis Nation of Alberta – Region 3  
30 (403) 569-8800  
31 [lgervais@metis.org](mailto:lgervais@metis.org)  
32  
33

34 Judy Gentes  
35 Regional Vice-President  
36 Métis Nation of Alberta – Region 3  
37 (403) 569-8800  
38 [jgentes@metis.org](mailto:jgentes@metis.org)  
39  
40

41 Doreen Dumont/Vaness Bergum  
42 Elder  
43 Métis Nation of Alberta – Region 3  
44 (403) 569-8800  
45 [ldbergum@telus.net](mailto:ldbergum@telus.net)  
46  
47

48 Noelle Rees  
49 Member  
50 Métis Nation of Alberta – Region 3  
51 (403) 569-8800  
52 [laughingyoga@hotmail.com](mailto:laughingyoga@hotmail.com)  
53  
54

55 Travis Ronald  
56 Member  
57 Métis Nation of Alberta – Region 3  
58 (403) 569-8800  
59 [silvr8@hotmail.ca](mailto:silvr8@hotmail.ca)  
60

1  
2  
3  
4 Tom Doupé  
5 Member  
6 Métis Nation of Alberta – Region 3  
7 (403) 569-8800  
8 [tsdoupe@telus.net](mailto:tsdoupe@telus.net)  
9

10  
11 Ashley Camponi  
12 Member  
13 Métis Nation of Alberta – Region 3  
14 (403) 569-8800  
15 [alcamponi@gmail.com](mailto:alcamponi@gmail.com)  
16  
17  
18  
19

20 **Keywords:** Métis health; spirituality; wellbeing; participatory; community-based; qualitative  
21  
22 survey development; Aboriginal health; Knowledge translation; Patient Oriented Research;  
23

24 Acknowledgements

25  
26 We wish to honor the memory of Marlene Lanz who was the Regional President of the MNA  
27 – Region 3 when we began this community-based research and encouraged us to keep  
28 moving forward.  
29

30 Thank you to the Elders, leaders, and community members who participated in survey  
31 development, data collection, and analysis.  
32

33 We want to acknowledge the Faculty of Nursing University of Calgary for a Research Stipend (Project  
34 ID 10016275), making the research possible.  
35  
36

37 Permission was obtained to copy, reproduce, and publish the International Association for  
38 Public Participation (IAP2) Spectrum of Public Health from the IAP2 on behalf of the IAP2  
39 International Federation.  
40  
41  
42  
43  
44  
45  
46  
47  
48  
49  
50  
51  
52  
53  
54  
55  
56  
57  
58  
59  
60

## Lay summary

Historically, Métis people were of North American Indian and European ancestry, and travellers who formed distinct communities. Due to ongoing effects of colonization, including questioning of Indigenous identity, changes to traditional ways of life, and a lack of legal rights, Métis people in Canada have experienced multiple inequities and intergenerational trauma, affecting individual, family, and community health and wellbeing. There is much information about colonization, loss, and marginalization for Métis people. However, more Métis-guided community-based research is needed about building community, developing social support, and practices for healing and health. The purpose of this study was to explore links between health, spirituality, and wellbeing within the Métis Nation of Alberta (MNA)-Region 3. We met with elected MNA – Region 3 leaders to discuss potential study topics and discussed ways to go about the study. With community members, informal and elected leaders, and an Elder from the MNA-Region 3, we co-developed a survey and distributed it face-to face with MNA – Region 3 members in Calgary, AB. We held a working group to analyse survey results together, developing themes and recommendations, which were shared and confirmed by the community. The top three priorities were: (1) passing on Métis traditions and culture to younger generation; (2) blending different cultural and spiritual practices; and (3) cultural immersion/traditional knowledge/learning in community. Community pilgrimages to sacred sites and regular community gatherings with spiritual, cultural, and educational focus provide potential to enhance health, spirituality, and wellbeing. Similar research across the remaining 5 regions in the MNA is recommended.

Exploring Métis health, spirituality, and wellbeing: A patient-oriented community-based pilot study with the Métis Nation of Alberta – Region 3

**Introduction**

The Truth and Reconciliation (TRC) Commission of Canada Calls to Action (1) indicate research arising from within First Nations, Métis, and Inuit (FNMI) communities can promote equity and justice. Historically, Métis people were of North American Indian and European ancestry, founders of the fur trade, and travellers who formed distinct communities, keeping close ties with families and kin who lived across a vast region.(2, 3) Métis leader Louis Riel (1844-1885), negotiated Manitoba's entrance into Canadian confederation, and was subsequently forced into exile.(3) Riel, a devout Catholic, celebrated his Indigenous ancestry:

Indian Blood throbs in me:  
And I praise my ancestors  
Who in the sweetest tone  
Taught me the Huron Carol (4, p. 13)

Riel was requested by Métis people in Saskatchewan to obtain titles for their land, and together with Gabriel Dumont, Riel waged a resistance against the Canadian government.(3) This resistance peaked in 1885 at Batoche, SK, where 5,000 Canadian soldiers fought 400 Métis and Cree; Métis families were scattered and forced into hiding.(2) Riel gave himself up for trial, was executed, and many Métis leaders were jailed. Additional intergenerational trauma (caused by physical, social, and cultural violence), occurred with the advent of residential schools and the Sixties Scoop.(2, 5) Approximately 9% of children taken to residential schools were Métis.(6) During the Sixties Scoop thousands of FNMI children were placed in foster care, and adopted by mostly non-Indigenous families throughout Canada and the United States.(5, 7) First Nations and Métis children in foster care are among

1  
2  
3 the most vulnerable children in Canada.(8) Currently, 7% of children in Canada are FNMI,  
4  
5 yet they comprise 52% of children < age 14 in care.(9)  
6  
7

8 Métis people have experienced marginalization and decreased wellbeing for varying  
9  
10 reasons: (1) scepticism of their identity as Indigenous people; (2) classification as Halfbreeds;  
11  
12 (3) government acquisition of land; (4) questioning and regulation of traditional ways of life;  
13  
14 and (5) encroachment on socio-economic and legal rights.(10) Much research regarding  
15  
16 detrimental effects of colonialism exists, but there is a lack of Métis-guided decolonizing,  
17  
18 participatory research contributing to understanding of individual, family, and community  
19  
20 wellbeing.(11) In addition, there is an urgent need for research contributing to development  
21  
22 of policies increasing health equity for FNMI people.(12) Alberta has the highest Métis  
23  
24 population in Canada, where over 114,375 people live within six regions, and the only  
25  
26 designated Métis land bases in Canada, comprising over 1.25 million acres of land.(13) This  
27  
28 community-based pilot study took place in the MNA-Region 3 (the southernmost part of the  
29  
30 MNA), within the city of Calgary, AB (a large urban centre > 1.3 million people). The  
31  
32 purpose of this community-based participatory pilot study was to explore links between  
33  
34 health, spirituality, and wellbeing within the Métis Nation of Alberta (MNA)-Region 3.  
35  
36  
37  
38  
39

#### 40 **Methods**

41  
42 Three theoretical frameworks grounded our research: (1) Ways of knowing, a belief in the  
43  
44 connectedness of all things (14, 15); (2) Participatory action research (PAR), influenced by  
45  
46 Lewin (1890-1947) who questioned societal change without community involvement, and  
47  
48 emphasized colonization's harmful effects (16), and founded by Freire (1921-1997) who  
49  
50 placed participants at the centre of the research processes (17, 18), and Borda (1925-2008),  
51  
52 incorporating local knowledge into power for change(18); and (3) the International  
53  
54 Association of Public Participation (IAP2) Public Participation Spectrum, used in the first  
55  
56 author's previous patient-oriented research.(19) As individuals move toward the right of the  
57  
58  
59  
60

1  
2  
3 spectrum (from being informed to consulted, from involved to collaborating), they become  
4  
5 the final decision-makers. See Figure 1.  
6

### 7 **Patient-Oriented Research**

8  
9  
10 All but the first author of this manuscript are members of the MNA – Region 3. The first 2  
11  
12 authors met with local MNA-3 elected leaders, discussed potential research topics, and how  
13  
14 to conduct the research. Community members, informal and elected leaders, and an Elder  
15  
16 from the MNA-Region 3 were invited to participate in focus groups at an MNA-Region 3  
17  
18 mixer (a large monthly social event) in October 2018; focus groups occurred in November  
19  
20 2018 and January 2019. Each focus group lasted approximately 2 hours, informed consent  
21  
22 was obtained, food was provided, and each participant received a \$50.00 gift certificate as a  
23  
24 thank-you. During focus groups, a community member and research team member took  
25  
26 notes, which were referred to throughout survey development. During the first focus group,  
27  
28 participants ( $n = 7$ ) discussed areas of interest in relation to health, spirituality, and wellbeing,  
29  
30 and identified meaningful survey questions. At the second focus group ( $n = 6$ ), two  
31  
32 participants from the first focus group were absent, but two new participants attended, further  
33  
34 discussion ensued, and a draft survey was developed. A qualitative structured survey was  
35  
36 approved by the leadership of the MNA-Region 3 in early February 2019. See Figure 2. Data  
37  
38 collection occurred face-to-face at two MNA-Region 3 mixers in February and March 2019.  
39  
40  
41  
42  
43

### 44 **Data analysis**

45  
46 Surveys ( $N = 29$ ) were de-identified, scanned, and transcribed into word documents. In April  
47  
48 2019, we engaged with a working group of community members, informal and elected  
49  
50 leaders, and an Elder ( $n = 7$ ) in participatory coding and theme development.(20, 21) Survey  
51  
52 data were laid out on a large table on separate pieces of paper, where participants picked up  
53  
54 those that held the most meaning to them, discussed why, and placed them in piles,  
55  
56  
57  
58  
59  
60

1  
2  
3 developing themes. During this focus group, Doreen Dumont/Vaness Bergum, MNA-Region  
4  
5 3's Elder spoke.

6  
7  
8 I come to you today to share the spirit, wisdom, and culture of our Métis heritage...In  
9  
10 the 1940's and the 50's it was against the law to speak our Michif language, against  
11  
12 the law to gather as a family or have community dances. Every summer in July, my  
13  
14 parents would place willows and a canvas over the box of the truck and load their  
15  
16 family of ten. Clothing, bedding, food, cooking supplies, and we headed off to Lac St  
17  
18 Anne Pilgrimage...We were taught to pray through the love of our parents. This was  
19  
20 also a time for friends and relatives to visit and share their language, fish, dried meat,  
21  
22 bannock, and stew. Loving times with people of Métis gathered...They would walk  
23  
24 for miles to be with their own people...I have memories and visions of my parents  
25  
26 walking in the healing waters of Lac St Anne. The spirit of Lac St Anne will remain  
27  
28 in my heart forever. No one can take the spirit of God from us. I have shared Lac St  
29  
30 Anne with my children and my grandchildren. (Doreen Dumont/Vaness Bergum)

31  
32  
33  
34  
35 The place of the healing waters at Lac St Anne in community wellbeing was confirmed, as  
36  
37 was the importance of meeting together regularly to participate in activities meaningful to the  
38  
39 community including spiritual, cultural, educational aspects of health and wellbeing. This  
40  
41 data analysis process and initial results were shared, discussed, and affirmed with enthusiasm  
42  
43 at an MNA-Region 3 mixer in May 2019.

#### 44 45 46 47 **Ethics approval**

48  
49 We developed a research proposal with local MNA-3 elected leaders, a formal research  
50  
51 agreement was signed, and CHREB ethical approval was obtained (REB18-0433).

#### 52 53 54 **Results**

55  
56 Surveys were completed by 29 participants, members of the MNA – Region 3, ranging in age  
57  
58 from 28 to 80 years. The top 3 areas of interest were: (1) passing on Métis traditions and  
59  
60

1  
2  
3 culture to younger generation (76%); (2) blending different cultural and spiritual practices  
4  
5 (72%); and (3) cultural immersion/traditional knowledge/learning in community (66%).  
6

7  
8 During co-analysis of survey data, an overarching theme of Connection and 4 corresponding  
9  
10 themes (to Métis ancestry, to community, to land, and to spirituality), were identified. See  
11  
12 Table 1.  
13

### 14 15 **Connection**

16  
17 Participants described health, spirituality, and wellbeing as “very much connected, more than  
18  
19 we accept” (C – 024); “spirituality is the nucleus or focus which keeps all others in balance  
20  
21 and sync” (C-004). Maintaining balance was central to wellbeing, “I find if you are not of a  
22  
23 sound mind then your body will never ‘fully’ be healthy. Our health starts internally and  
24  
25 mentally” (C-023). Connection between addiction and spirituality was noted, “Most people  
26  
27 that have addictions are hurting inside and they are trying to fix it.” (C-008). Health,  
28  
29 spirituality, and wellbeing, “totally connected, the difficulty is western culture asks us to  
30  
31 work and live leaving emotions and spirituality out of the picture, then we suffer  
32  
33 consequences of mental health issues.” (C - 002)  
34  
35  
36

### 37 38 **Connection to Métis ancestry**

39  
40 Tension between choosing to hide or disclose Métis ancestry was identified: “If I hide my  
41  
42 Métis identity my spirit and my health suffer. If I share my Métis identity with mainstream  
43  
44 society, I suffer racism” (C-002); “They tell me to say I am French as the Métis are  
45  
46 sometimes looked down on but I am who I am” (C-001). Some experienced early awareness  
47  
48 of Métis identity, “Grounded! Always have known who I was and my family and Métis  
49  
50 culture” (C-022), while others did not. Experiencing racism occurred in conjunction with  
51  
52 experiences of belonging, “The more I share my identity, the more others are accepting of  
53  
54 me. The more I hide my identity, the more untrusting (confused) people can be of me” (C-  
55  
56 014). One noted “If the medical community is aware that I am Aboriginal there is obvious  
57  
58  
59  
60



1  
2  
3 discrimination” (C-021), while another described “protecting yourself from racist people.  
4  
5 You put up a shield of armour to protect your senses hearing, sight and heart” (C-003).  
6  
7

### 8 **Connection to community**

9  
10 Health, spirituality, and wellbeing “they’re all connected through my community” (C-021);  
11  
12 “once I knew I was Métis and met more Métis I felt like I had come home” (C-008); “I am  
13  
14 very new to the community, so being part of this community really brings me joy-which  
15  
16 helps with my wellbeing” (C-016). Effects of trauma on individual and community healing  
17  
18 and wholeness were identified, “I am highly interested in how past trauma can be passed  
19  
20 down to younger generations and how we can break the cycle of addiction/abuse” (C-023).  
21  
22

### 23 **Connection to land**

24  
25 For many, connection to land and community contributed to health and wellbeing, but had  
26  
27 been interrupted, “want to see the harvesting rights given to the Métis the same as the First  
28  
29 Nations. Grandmother was robbed of her land by the government” (C-030). Connection to  
30  
31 land included passing on historical knowledge and traditions in a community context.  
32  
33 Connecting with the land involved historical understanding and current adaptation of  
34  
35 sustainability such as harvesting fish with nets, “how much more beneficial is it with  
36  
37 sustainable harvesting to use rod and line? My ancestors were scouts and interpreters- I am  
38  
39 honoured with the example they have left for me to follow” (C-004).  
40  
41  
42  
43

### 44 **Connection to tradition**

45  
46 Connection to Indigenous and Roman Catholic traditions of wellness and healing included  
47  
48 actions, practices, and rituals: “became a eucharistic minister in my church and Lac St. Anne  
49  
50 pilgrimage” (C-003); “becoming a pipe healer/storyteller” (C-024); and blending “traditional  
51  
52 and non-traditional healing and health care” (C-022). “When I feel spiritually connected, I  
53  
54 feel better, physically look better and feel grounded” (C-014).  
55  
56  
57

58 Our Creator, Great Spirit & Lord is viewed, pondered, worshipped by all.  
59  
60

1  
2  
3 Where for art Thou? everywhere, in everything.  
4

5 Tho Far beyond words I have another name for the way in which, we are never alone.  
6

7 Thee Orchestrator of Infinity rhymes with Divinity, while embracing every heartbeat  
8

9 of every creature, Poetry in motion, Loves our devotion. (Travis Ronald)  
10  
11

## 12 **Interpretation**

13

14 In this community-based participatory pilot study we co-developed and distributed a  
15 qualitative structured survey to explore health, spirituality, and wellbeing within the MNA-  
16 Region 3. An overarching theme of connection emerged, to Métis ancestry, to community, to  
17 land, and to tradition. The place of community pilgrimages to sacred sites and cultural tours  
18 to historical sites were confirmed as contributing to individual, family, and community  
19 wellbeing and healing. Meeting together regularly to participate in meaningful community  
20 activities including spiritual, cultural, and educational aspects of health and wellbeing was  
21 also recommended.  
22  
23  
24  
25  
26  
27  
28  
29  
30  
31  
32

33 Some participants always knew they were Métis, while others discovered it later in  
34 life. There existed tension regarding choosing to reveal identity; passing as “white” had been  
35 used as a survival tactic in the past, which could contribute to decreased connection with  
36 spirituality.(22) At a two-day 2018 federal government emergency meeting regarding the  
37 high number of FNMI children in care, key causes of Métis children in care included  
38 ignorance among child welfare authorities about who Métis people are.(9) Participants  
39 described health, spirituality, and wellbeing occurring in community, and although individual  
40 and community wholeness and healing were described, so were effects of trauma, and the  
41 need to break intergenerational cycles of addiction/abuse. Participants talked about the  
42 importance of telling their stories. Managing intergenerational trauma, resultant health  
43 disparities, and ongoing structural violence requires protective buffers: (1) decolonizing  
44 strategies such as self-determination and self-governance; (2) identity formation such as  
45  
46  
47  
48  
49  
50  
51  
52  
53  
54  
55  
56  
57  
58  
59  
60

1  
2  
3 cultural engagement, healing practices, and spiritual ceremonies; and (3) culturally-adapted  
4 interventions such as incorporating information on acculturation, colonization, and historical  
5 trauma.(23) On June 27, 2019, the MNA signed the first self-government agreement between  
6 a Métis nation and the Government of Canada, with a clearly-defined process to implement  
7 Métis jurisdiction in core areas of self-government.(24)

8  
9  
10  
11  
12  
13  
14  
15 Participants described wanting to reconnect with land and seeking reparation for  
16 wrongs done in their families and communities. The Canadian government issued Métis scrip  
17 (Halfbreed scrip), providing the appearance of Métis land entitlement, but instead facilitating  
18 wealth accumulation and western settlement (Tough and McGregor 2011). The Canadian  
19 government has moved slowly regarding land claims and reconciliation with FNMI people,  
20 and specifically for Métis title claims, which are justified and strong, there has been little  
21 action.(25) Métis people have faced discrimination due to their mixed heritage, each  
22 generation has experienced challenges, with resultant resilience, determination, and  
23 independence, and a strong, adaptable work ethic; current challenges include reconnecting  
24 with Métis identity, culture, and tradition.(26) For Métis people, moving forward toward  
25 healing and wellbeing includes recognition of the intergenerational effects of trauma, and the  
26 essential place of family and community.

27  
28  
29  
30  
31  
32  
33  
34  
35  
36  
37  
38  
39  
40  
41  
42  
43  
44  
45  
46  
47  
48  
49  
50  
51  
52  
53  
54  
55  
56  
57  
58  
59  
60  
61  
62  
63  
64  
65  
66  
67  
68  
69  
70  
71  
72  
73  
74  
75  
76  
77  
78  
79  
80  
81  
82  
83  
84  
85  
86  
87  
88  
89  
90  
91  
92  
93  
94  
95  
96  
97  
98  
99  
100  
101  
102  
103  
104  
105  
106  
107  
108  
109  
110  
111  
112  
113  
114  
115  
116  
117  
118  
119  
120  
121  
122  
123  
124  
125  
126  
127  
128  
129  
130  
131  
132  
133  
134  
135  
136  
137  
138  
139  
140  
141  
142  
143  
144  
145  
146  
147  
148  
149  
150  
151  
152  
153  
154  
155  
156  
157  
158  
159  
160  
161  
162  
163  
164  
165  
166  
167  
168  
169  
170  
171  
172  
173  
174  
175  
176  
177  
178  
179  
180  
181  
182  
183  
184  
185  
186  
187  
188  
189  
190  
191  
192  
193  
194  
195  
196  
197  
198  
199  
200  
201  
202  
203  
204  
205  
206  
207  
208  
209  
210  
211  
212  
213  
214  
215  
216  
217  
218  
219  
220  
221  
222  
223  
224  
225  
226  
227  
228  
229  
230  
231  
232  
233  
234  
235  
236  
237  
238  
239  
240  
241  
242  
243  
244  
245  
246  
247  
248  
249  
250  
251  
252  
253  
254  
255  
256  
257  
258  
259  
260  
261  
262  
263  
264  
265  
266  
267  
268  
269  
270  
271  
272  
273  
274  
275  
276  
277  
278  
279  
280  
281  
282  
283  
284  
285  
286  
287  
288  
289  
290  
291  
292  
293  
294  
295  
296  
297  
298  
299  
300  
301  
302  
303  
304  
305  
306  
307  
308  
309  
310  
311  
312  
313  
314  
315  
316  
317  
318  
319  
320  
321  
322  
323  
324  
325  
326  
327  
328  
329  
330  
331  
332  
333  
334  
335  
336  
337  
338  
339  
340  
341  
342  
343  
344  
345  
346  
347  
348  
349  
350  
351  
352  
353  
354  
355  
356  
357  
358  
359  
360  
361  
362  
363  
364  
365  
366  
367  
368  
369  
370  
371  
372  
373  
374  
375  
376  
377  
378  
379  
380  
381  
382  
383  
384  
385  
386  
387  
388  
389  
390  
391  
392  
393  
394  
395  
396  
397  
398  
399  
400  
401  
402  
403  
404  
405  
406  
407  
408  
409  
410  
411  
412  
413  
414  
415  
416  
417  
418  
419  
420  
421  
422  
423  
424  
425  
426  
427  
428  
429  
430  
431  
432  
433  
434  
435  
436  
437  
438  
439  
440  
441  
442  
443  
444  
445  
446  
447  
448  
449  
450  
451  
452  
453  
454  
455  
456  
457  
458  
459  
460  
461  
462  
463  
464  
465  
466  
467  
468  
469  
470  
471  
472  
473  
474  
475  
476  
477  
478  
479  
480  
481  
482  
483  
484  
485  
486  
487  
488  
489  
490  
491  
492  
493  
494  
495  
496  
497  
498  
499  
500  
501  
502  
503  
504  
505  
506  
507  
508  
509  
510  
511  
512  
513  
514  
515  
516  
517  
518  
519  
520  
521  
522  
523  
524  
525  
526  
527  
528  
529  
530  
531  
532  
533  
534  
535  
536  
537  
538  
539  
540  
541  
542  
543  
544  
545  
546  
547  
548  
549  
550  
551  
552  
553  
554  
555  
556  
557  
558  
559  
560  
561  
562  
563  
564  
565  
566  
567  
568  
569  
570  
571  
572  
573  
574  
575  
576  
577  
578  
579  
580  
581  
582  
583  
584  
585  
586  
587  
588  
589  
590  
591  
592  
593  
594  
595  
596  
597  
598  
599  
600  
601  
602  
603  
604  
605  
606  
607  
608  
609  
610  
611  
612  
613  
614  
615  
616  
617  
618  
619  
620  
621  
622  
623  
624  
625  
626  
627  
628  
629  
630  
631  
632  
633  
634  
635  
636  
637  
638  
639  
640  
641  
642  
643  
644  
645  
646  
647  
648  
649  
650  
651  
652  
653  
654  
655  
656  
657  
658  
659  
660  
661  
662  
663  
664  
665  
666  
667  
668  
669  
670  
671  
672  
673  
674  
675  
676  
677  
678  
679  
680  
681  
682  
683  
684  
685  
686  
687  
688  
689  
690  
691  
692  
693  
694  
695  
696  
697  
698  
699  
700  
701  
702  
703  
704  
705  
706  
707  
708  
709  
710  
711  
712  
713  
714  
715  
716  
717  
718  
719  
720  
721  
722  
723  
724  
725  
726  
727  
728  
729  
730  
731  
732  
733  
734  
735  
736  
737  
738  
739  
740  
741  
742  
743  
744  
745  
746  
747  
748  
749  
750  
751  
752  
753  
754  
755  
756  
757  
758  
759  
760  
761  
762  
763  
764  
765  
766  
767  
768  
769  
770  
771  
772  
773  
774  
775  
776  
777  
778  
779  
780  
781  
782  
783  
784  
785  
786  
787  
788  
789  
790  
791  
792  
793  
794  
795  
796  
797  
798  
799  
800  
801  
802  
803  
804  
805  
806  
807  
808  
809  
810  
811  
812  
813  
814  
815  
816  
817  
818  
819  
820  
821  
822  
823  
824  
825  
826  
827  
828  
829  
830  
831  
832  
833  
834  
835  
836  
837  
838  
839  
840  
841  
842  
843  
844  
845  
846  
847  
848  
849  
850  
851  
852  
853  
854  
855  
856  
857  
858  
859  
860  
861  
862  
863  
864  
865  
866  
867  
868  
869  
870  
871  
872  
873  
874  
875  
876  
877  
878  
879  
880  
881  
882  
883  
884  
885  
886  
887  
888  
889  
890  
891  
892  
893  
894  
895  
896  
897  
898  
899  
900  
901  
902  
903  
904  
905  
906  
907  
908  
909  
910  
911  
912  
913  
914  
915  
916  
917  
918  
919  
920  
921  
922  
923  
924  
925  
926  
927  
928  
929  
930  
931  
932  
933  
934  
935  
936  
937  
938  
939  
940  
941  
942  
943  
944  
945  
946  
947  
948  
949  
950  
951  
952  
953  
954  
955  
956  
957  
958  
959  
960  
961  
962  
963  
964  
965  
966  
967  
968  
969  
970  
971  
972  
973  
974  
975  
976  
977  
978  
979  
980  
981  
982  
983  
984  
985  
986  
987  
988  
989  
990  
991  
992  
993  
994  
995  
996  
997  
998  
999  
1000

Limitations of our pilot study were the small sample size in one geographical area therefore, findings may not be generalizable to the entire MNA-Region 3. There is much diversity throughout Métis communities, and priorities contributing to wellbeing may differ in unique ways, therefore we recommend further face-to-face survey distribution in collaboration with community members, informal and elected leaders, and Elders throughout the remaining communities in the MNA-Region 3. Hierarchical development and transfer of knowledge is not ethical or advantageous, however, community-based participatory research can promote equity and justice and increase wellbeing.(27, 28) FNMI people are strong and

1  
2  
3 resilient, with a holistic world view that has potential to contribute to the overall health and  
4  
5 wellbeing of all Canadians.(29)  
6

7  
8 Lessons learned in our patient-oriented community-based pilot study included the  
9  
10 following. Participants in our pilot study described the importance of telling their stories, of  
11  
12 sharing who they are, and persisting in pursuing wellbeing for themselves and their  
13  
14 communities. Engaging the MNA – Region 3 community in co-developing, distributing, and  
15  
16 analysing a qualitative structured survey presented opportunity for: (1) Increased individual  
17  
18 and community knowledge Métis identity/ancestry and health, spirituality, and wellbeing; (2)  
19  
20 increased research capacity within the MNA – Region 3; (3) increased collaboration in  
21  
22 community-led identification of priorities for community-initiated funding and policy  
23  
24 development; and (4) contributing to increased individual, family, and community wellbeing  
25  
26 within the MNA – Region 3 and beyond. We recommend engaging in Métis-guided  
27  
28 community-based research across the remaining 5 regions in the MNA.  
29  
30  
31  
32  
33  
34  
35  
36  
37  
38  
39  
40  
41  
42  
43  
44  
45  
46  
47  
48  
49  
50  
51  
52  
53  
54  
55  
56  
57  
58  
59  
60

## References

1. The Truth and Reconciliation Commission of Canada. Honoring the truth, reconciling for the future: Summary of the final report of the Truth and Reconciliation Commission of Canada. Winnipeg, MB, Canada: Library and Archives Canada.; 2015. p. 1-528.
2. Podruchny C, Thistle J. A geography of blood: Uncovering the hidden histories of Metis peoples in Canada. In: Lehmkuhl U, Lusebrink H-J, McFalls L, editors. Spaces of difference: Conflicts and cohabitation. Munster, Germany: Waxmann; 2016. p. 61-82.
3. . Available from: [www.mmf.mb.ca](http://www.mmf.mb.ca).
4. Scofield G. Louis: The heretic poems. Gibsons, BC: Canada: Nightwood Editions; 2011.
5. What we heard: Report of the Métis Nation's engagement with Métis Sixties Scoop survivors [Internet]. 2019. Available from: <https://metisixtiesscoop.ca/wp-content/uploads/2019/11/What-We-Heard-Report-2019.pdf>.
6. Chartrand LN, Logan TE, Daniels JD. The Aboriginal Healing Foundation: Métis history and experience and residential schools in Canada. Ottawa, ON, Canada 2006.
7. Spencer DC. Extraction and pulverization: A narrative analysis of Canada scoop survivors. *Settler Colonial Studies*. 2017;7(1):57-71.
8. Tait CL, Henry R, Walker RL. Child welfare: A social determinant of health for Canadian First Nations and Métis children. *Pimatisiwin: A Journal for Aboriginal and Indigenous Community Health*. 2013;11(1):39-53.
9. Government of Canada. A report on children and families together: An emergency meeting on Indigenous child and family services. Ottawa, ON, Canada: Indigenous Services Canada, Government of Canada; 2018.

- 1  
2  
3 10. Macdougall B. Land, family and identity: Contextualizing Metis health and well-  
4 being. Prince George, BC, Canada: National Collaborating Centre for Aboriginal Health;  
5 2017.  
6  
7
- 8  
9  
10 11. Kumar MB, Wesche S, McGuire C. Trends in Métis-related health research (1980–  
11 2009): Identification of research gaps. *Can J Public Health*. 2012;103(1):23-8.  
12
- 13  
14 12. McNally M, Martin D. First Nations, Inuit and Métis health: Considerations for  
15 Canadian health leaders in the wake of the Truth and Reconciliation Commission of Canada  
16 report. *Healthc Manage Forum*. 2017;30(2):117-22.  
17
- 18  
19 13. Government of Alberta. Métis relations: Information on Métis history, organizations,  
20 and legislation. 2019.  
21
- 22  
23 14. Bastien B. Blackfoot ways of knowing: The worldview of the Siksikaitstapi: Calgary,  
24 AB, Canada: University of Calgary Press; 2004.  
25
- 26  
27 15. Hungry Wolf B. The ways of my grandmothers. New York, NY: William Morrow  
28 and Co.; 1980.  
29
- 30  
31 16. Lewin K. Action research and minority problems. *J Soc Iss*. 1946;2(4):34-46.  
32
- 33  
34 17. Freire P. Pedagogy of the oppressed. 30th Anniversary Edition ed. New York, NY:  
35 Continuum International Publishing Group; 1970/1993.  
36
- 37  
38 18. Borda OF, Rahman MA. Action and knowledge: Breaking the monopoly with  
39 participatory action-research: Apex Press; 1991.  
40
- 41  
42 19. Ginn C, Bright KR, Keys EM, Brockway ML, Tomfohr-Madsen L, Benzies K. Study  
43 protocol: Determining research priorities of young Canadian families (the Family Research  
44 Agenda Initiative Setting Project – FRAISE) *Frontiers in Public Health*. 2018.  
45
- 46  
47 20. Ginn C, Kulig JC. Participatory action research with a group of urban First Nations  
48 grandmothers: Decreasing inequities through health promotion. *The International Indigenous  
49 Policy Journal*. 2015;6(1):1-16.  
50  
51  
52  
53  
54  
55  
56  
57  
58  
59  
60

- 1  
2  
3 21. Bartlett JG, Iwasaki Y, Gottlieb B, Hall D, Mannell R. Framework for Aboriginal-  
4 guided decolonizing research involving Métis and First Nations persons with diabetes. Soc  
5  
6 Sci Med. 2007;65(11):2371-82.  
7
- 8  
9  
10 22. Fiola C. Rekindling the sacred fire: Métis ancestry and Anishinaabe spirituality. .  
11  
12 Winnipeg, MB, Canada: University of Manitoba Press; 2015.  
13
- 14 23. Nutton J, Fast E. Historical trauma, substance use, and indigenous peoples: Seven  
15  
16 generations of harm from a “Big Event”. *Subst Use Misuse*. 2015;50(7):839-47.  
17
- 18 24. After 90 years, Métis Nation within Alberta achieves federal recognition of its self-  
19  
20 government [press release]. Edmonton, AB, Canada, June 27 2019 2019.  
21  
22
- 23 25. Drake K, Gaudry A. The lands belonged to them, once by the Indian title, twice for  
24  
25 having defended them, and thrice for having built and lived on them: The law and politics of  
26  
27 Metis title. *Osgoode Hall Law Journal*. 2017;54:1-52.  
28
- 29 26. Kirmayer LJ, Dandeneau S, Marshall E, Phillips MK, Williamson KJ. Toward an  
30  
31 ecology of stories: Indigenous perspectives on resilience. In: Ungar M, editor. *The social*  
32  
33 *ecology of resilience*: Springer; 2012. p. 399-414.  
34  
35
- 36 27. Smylie J, Olding M, Ziegler C. Sharing what we know about living a good life:  
37  
38 Indigenous approaches to knowledge translation. *The Journal of the Canadian Health*  
39  
40 *Libraries Association*. 2014;35:16.  
41  
42
- 43 28. Wallerstein N, Duran B. Community-based participatory research contributions to  
44  
45 intervention research: The intersection of science and practice to improve health equity. *Am J*  
46  
47 *Public Health*. 2010;100(S1):S40-S6.  
48  
49
- 50 29. National Collaborating Centre for Aboriginal Health. An overview of Aboriginal  
51  
52 health in Canada. Prince George, BC, Canada: University of Northern British Columbia 2013.  
53  
54  
55  
56  
57  
58  
59  
60

| Table 1: Quotes supporting primary themes |                                                                                                                                                                                                                                                                                                                                                                                                                                                                                                                                                                                                                                                                                                                                                                                                                                                                                                                                                                                                                                                                                                                                                                                                                                                                                                                                                                                                                                                                                                                                                                                                                                                                                                                                                                                                                                                                                                                                          |
|-------------------------------------------|------------------------------------------------------------------------------------------------------------------------------------------------------------------------------------------------------------------------------------------------------------------------------------------------------------------------------------------------------------------------------------------------------------------------------------------------------------------------------------------------------------------------------------------------------------------------------------------------------------------------------------------------------------------------------------------------------------------------------------------------------------------------------------------------------------------------------------------------------------------------------------------------------------------------------------------------------------------------------------------------------------------------------------------------------------------------------------------------------------------------------------------------------------------------------------------------------------------------------------------------------------------------------------------------------------------------------------------------------------------------------------------------------------------------------------------------------------------------------------------------------------------------------------------------------------------------------------------------------------------------------------------------------------------------------------------------------------------------------------------------------------------------------------------------------------------------------------------------------------------------------------------------------------------------------------------|
| Theme; subthemes                          | Representative quotes                                                                                                                                                                                                                                                                                                                                                                                                                                                                                                                                                                                                                                                                                                                                                                                                                                                                                                                                                                                                                                                                                                                                                                                                                                                                                                                                                                                                                                                                                                                                                                                                                                                                                                                                                                                                                                                                                                                    |
| Connection                                | <p>When my spirit loses a sense of purpose, lack of love, too much stress, life distractions then my health starts to decline and my whole sense of well-being suffers adversely. We must feed all: mind, body, soul, spirit, and love! (C-013)</p> <p>Take medicine and food that you grow. Be happy and don't dwell on negative people. Walk away lonely to people that will hurt you. (C-001)</p> <p>I learned of the medicine circle many years ago. It is an Aboriginal approach to the way that there are four directions in life, North, South, East &amp; West. There are also four major categories for humans to consider &amp; prioritize. Mental, Emotional, Spiritual, &amp; Physical. I have been told and consider it to be a very valuable way of looking at things... Balance all four of these areas equally. If you are too emotional, or too spiritual, your other areas will be less fulfilled causing you to be unbalanced. Just as the wind is under both wings of every bird, there is a natural balance to admire, and to strive to achieve in your own ingredients of life. (C – 020)</p> <p>Addiction and spirituality, both are very deep in nature and effect. One is dangerous and the other is strengthening. In other word opposites yet competing. Spirituality and cultural history as a tool for healing. One needs something to believe in. To rely on both on an ongoing nature. Something that should deepen over the years as one grows older and more dependent on beliefs as their physical activity decreases and needs something to replace it. (C-015)</p> <p>A need for continued support for recovering alcoholism and drug abuse. Need place to go for support groups. List of people to call when think I am going to relapse. (C-030)</p> <p>When I am not in touch with my spirit, I feel unwell. (C-012)</p> <p>When you are healthy spiritually you are usually healthy. (C-011)</p> |
| 1. Connection to Métis Ancestry           | <p>My grandfather hid from our family that we were Métis because of the prejudice that existed against Métis back in the 1920's when he started his family near Winnipeg, MB. I didn't find out that I was Métis until I did some research into my family tree in 2003. It took me over a year on my own to put together the genealogy but the family history and stories I found to be amazing and explained a lot to me of who I was and why I am the way I am. (C-010)</p>                                                                                                                                                                                                                                                                                                                                                                                                                                                                                                                                                                                                                                                                                                                                                                                                                                                                                                                                                                                                                                                                                                                                                                                                                                                                                                                                                                                                                                                            |



|                                   |                                                                                                                                                                                                                                                                                                                                                                                                                                                                                                                                                                                                                                                                                                                                                                                                                                                                                                                                                                                                                                                                                                                                                                                                                      |
|-----------------------------------|----------------------------------------------------------------------------------------------------------------------------------------------------------------------------------------------------------------------------------------------------------------------------------------------------------------------------------------------------------------------------------------------------------------------------------------------------------------------------------------------------------------------------------------------------------------------------------------------------------------------------------------------------------------------------------------------------------------------------------------------------------------------------------------------------------------------------------------------------------------------------------------------------------------------------------------------------------------------------------------------------------------------------------------------------------------------------------------------------------------------------------------------------------------------------------------------------------------------|
|                                   | <p>Once we learnt about our Métis status we have been learning, trying to understand why my parents never talked about it. My mom who is now nearly 90 years old has started to tell us a bit more. (C-006)</p> <p>Though some would say that Métis people can usually hide their identity, this hiding does nothing to promote health, spirituality, and wellbeing. Being Métis lots of people tend to believe that I am not a productive worthwhile human being. Sometimes it is easier to fall into the trap of what people expect instead of standing up for what I truly believe and what I really am! (C-030)</p>                                                                                                                                                                                                                                                                                                                                                                                                                                                                                                                                                                                              |
| <p>2. Connection to Community</p> | <p>I believe that addressing the wholeness of a person and of a community is the only way that we can address root causes of the intergenerational and direct trauma that cause indigenous people to remain on the margins of society. These traumas, combined with systemic racism trap us in lifestyles where our choices become very limited and the cycles of hopelessness are perpetuated. Our culture and language are who we are and who we always have been. They are our spirituality, our religion and our governance. They are integral to our ability to heal because without them neither the individual nor the community can reclaim our wholeness. Until we are whole we cannot see other than what we have already seen. (C-017)</p> <p>The Métis culture is very hard working and they are very productive in the community. Lots of the Métis people start companies and contribute to society. (C – 030)</p>                                                                                                                                                                                                                                                                                     |
| <p>3. Connection to Land</p>      | <p>Can we teach cultural history and practices to foster spirituality in a way “providing soul food” for one’s spirit. If we have gaps in our cultural history and identity can we for spiritually whole and fulfilled? Passing on Métis traditions and culture to younger generations- Feel this is important to foster a younger healthy thriving Métis generation. This can take through numerous modalities: music, art, song, games, etc. representing of traditional cultures. Would be amazing to have cultural “tours” to key Métis historical sites via community bus. Guided informative and a journey of healing, understanding and cultural immersion ... “retreats”- spiritual, cultural, educational that can be informative, experiential and healing as a collective. (C-013)</p> <p>I have strong feelings that we as a nation of Métis people need to reconnect with the land to be self-sufficient and live off the land to find better health nutritionally but also mentally and the work to do so creates physical health. Land claims- I hope that as a nation we can get our land back so we can continue to become more self-sufficient and provide healthy food for ourselves. (C-019)</p> |

|                                   |                                                                                                                                                                                                                                                                                                                                                                                                                                                                                                                                                                                                                                                                                                                                                                                                                                                                                                                                                                                                                                                                                                                                                                                                                                                                                                                                                                                        |
|-----------------------------------|----------------------------------------------------------------------------------------------------------------------------------------------------------------------------------------------------------------------------------------------------------------------------------------------------------------------------------------------------------------------------------------------------------------------------------------------------------------------------------------------------------------------------------------------------------------------------------------------------------------------------------------------------------------------------------------------------------------------------------------------------------------------------------------------------------------------------------------------------------------------------------------------------------------------------------------------------------------------------------------------------------------------------------------------------------------------------------------------------------------------------------------------------------------------------------------------------------------------------------------------------------------------------------------------------------------------------------------------------------------------------------------|
|                                   | <p>We belong to the land and without our connection to the land and nature we suffer. We are community spirited and without our kinship we are lost. Strong culture = strong spirit. (C-002)</p> <p>Body movement, breath work, connection to land, prayer, smudge, healthy food, and being connected to heart is and has played a major key in my current health. (C-031)</p> <p>I go to church most weeks and I believe this helps keep a person happier through the good times and the bad times that this life can dish out. My Catholic religion helps me with spirituality and my Métis background helps me to find this spirituality in the great outdoors out in the environment and wilderness. (C-010)</p>                                                                                                                                                                                                                                                                                                                                                                                                                                                                                                                                                                                                                                                                   |
| <p>4. Connection to Tradition</p> | <p>I believe having a connection with a higher power gives people a reason to live and a sense of moral responsibility. Our general wellbeing is constantly affected by our daily decision making and our daily decision making can be directly linked to our spirituality or lack thereof. (C-019)</p> <p>I walk with the lord...coming to know Jesus as my Lord and allowing him to be part of my life- He healed my mind body and soul. (C-008)</p> <p>My Catholic religion provides me with my God and my God is the Creator. (C-010)</p> <p>How best can blending different cultures and spiritual practices be bridged to honour and respect both? (C-013)</p> <p>Smudging is good and helps me feel good. Also sweats, praying and keeping in touch with my spirituality helps me maintain a good perspective on life. (C-011)</p> <p>I pray to many gods: JC, Creator, Quan Yin, Buddha, Angel Spirits, Animal Totems. Gives greater sense of totality and connectedness to all having something to offer. I pray, drum, smudge, practice yoga, read about angels after life, traditional practices and rather choose what works. (C-013)</p> <p>I attend Christian church and blend my spiritual knowledge and thoughts with the moral ideals and teachings at the church. If there were a Métis church that imparted traditional teachings, I would attend that. (C-019)</p> |

## IAP2'S PUBLIC PARTICIPATION SPECTRUM

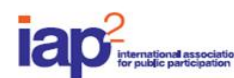

The IAP2 Federation has developed the Spectrum to help groups define the public's role in any public participation process. The IAP2 Spectrum is quickly becoming an international standard.

|                           |                       | INCREASING IMPACT ON THE DECISION                                      |                                                                                                                                                                                                      |                                                                                                                                                                                           |                                                                                                                                                          |                                                            |
|---------------------------|-----------------------|----------------------------------------------------------------------------------------------------------------------------------------------------------|------------------------------------------------------------------------------------------------------------------------------------------------------------------------------------------------------|-------------------------------------------------------------------------------------------------------------------------------------------------------------------------------------------|----------------------------------------------------------------------------------------------------------------------------------------------------------|------------------------------------------------------------|
|                           |                       | INFORM                                                                                                                                                   | CONSULT                                                                                                                                                                                              | INVOLVE                                                                                                                                                                                   | COLLABORATE                                                                                                                                              | EMPOWER                                                    |
| PUBLIC PARTICIPATION GOAL |                       | To provide the public with balanced and objective information to assist them in understanding the problem, alternatives, opportunities and/or solutions. | To obtain public feedback on analysis, alternatives and/or decisions.                                                                                                                                | To work directly with the public throughout the process to ensure that public concerns and aspirations are consistently understood and considered.                                        | To partner with the public in each aspect of the decision including the development of alternatives and the identification of the preferred solution.    | To place final decision making in the hands of the public. |
|                           | PROMISE TO THE PUBLIC | We will keep you informed.                                                                                                                               | We will keep you informed, listen to and acknowledge concerns and aspirations, and provide feedback on how public input influenced the decision. We will seek your feedback on drafts and proposals. | We will work with you to ensure that your concerns and aspirations are directly reflected in the alternatives developed and provide feedback on how public input influenced the decision. | We will work together with you to formulate solutions and incorporate your advice and recommendations into the decisions to the maximum extent possible. | We will implement what you decide.                         |

© IAP2 International Federation 2014. All rights reserved.

Figure 1: International Association of Public Participation (IAP2) Public Participation Spectrum.

Note: Permission was obtained to copy, reproduce, and publish the International Association for Public Participation (IAP2) Spectrum of Public Health from the IAP2 on behalf of the IAP2 International Federation.

Study ID \_\_\_\_\_ Date of Birth: \_\_\_\_\_

Members, leaders, and Elders of the MNA – Region 3 have met together to develop these questions/questionnaire/survey.

Please check off areas of interest to you:

|                          |                                                                             |
|--------------------------|-----------------------------------------------------------------------------|
| <input type="checkbox"/> | Prison ministries                                                           |
| <input type="checkbox"/> | Addiction and spirituality                                                  |
| <input type="checkbox"/> | Blending different cultural and spiritual practices                         |
| <input type="checkbox"/> | Cultural immersion/traditional knowledge/learning in community              |
| <input type="checkbox"/> | Spirituality and cultural history as a tool for healing                     |
| <input type="checkbox"/> | Elder’s role in healing (physical and spiritual)                            |
| <input type="checkbox"/> | Reconciliation and forgiveness (government and church)                      |
| <input type="checkbox"/> | Passing on Métis traditions and culture to younger generation               |
| <input type="checkbox"/> | Nutrition and mental/physical wellness (for example Diabetes/Mental health) |
| <input type="checkbox"/> | Land claims and harvesting rights                                           |
| <input type="checkbox"/> | Learning and preserving language                                            |
| <input type="checkbox"/> | Pilgrimages to sacred sites                                                 |

Please use the next few pages to write about any of the topics you checked off above.

Additional Questions:

- (1) Are there ways that you see your health, spirituality, and wellbeing as connected?
- (2) What are the most important things you have done in your lifetime that have impacted your health?
- (3) Are there ways that your Métis identity affects your health, spirituality, or wellbeing?
- (4) How do you blend different religious or spiritual practices to maintain your health, spirituality, or wellbeing?
- (5) Are there any other areas you want to write about related to health, spirituality, and wellbeing?

Figure 2: Qualitative structured survey.

Ref: Request for permission to copy, reproduce or publish IAP2 Federation copyrighted materials

Ellen Ernst - IAP2 <operations@iap2.org>  
To: Carla Ginn

Reply Reply All Forward ...  
Mon 16/12/2019 12:49

Click here to download pictures. To help protect your privacy, Outlook prevented automatic download of some pictures in this message.

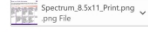

Dear Carla,

Thank you for demonstrating your interest in the work and in the copyrighted materials of the IAP2 International Federation.

As you may be aware, IAP2 is a Not-for-Profit international organization and a pre-eminent actor in the field of public participation globally. Remaining faithful to our mission, we believe in the importance of conserving the integrity of our publications and our training course materials which are a product of the generous volunteer contributions of numerous individuals from around the world.

On behalf of the IAP2 International Federation, this message is to confirm that we grant you permission to use the following IAP2 material for the purposes as stated in your request: **IAP2 Spectrum of Public Participation**. We would appreciate receiving a copy of your publication once final, so that we can inform our contributors, as we do at the end of each year, about the global reach of our work.

We understand you agree to clearly acknowledge the IAP2 Federation as the source. Current versions of the SPECTRUM, Code of Ethics and Core Values are available in PDF format on the IAP2 website, <https://www.iap2.org/page/about> and click on the **Resources** link.

We wish you success in your endeavours. Let me know if you need anything else.

Regards,  
Ellen

**Ellen Ernst** | Executive Manager | IAP2 Federation  
T: +1 858 837 0124 | S: ellen\_ernst | F: +1 858 430 3178  
Email: [operations@iap2.org](mailto:operations@iap2.org) | [www.iap2.org](http://www.iap2.org)

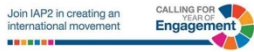

405x189mm (240 x 240 DPI)

## GRIPP2 Short Form

| Section and Topic | Item                                                                                                                                                                                                                                                                                                                                                                                                                                                                                                                                                                                                                                                                                                                                                                                                                                                                                                                                                                                                                                                                                                                                                                                                                                                                                                                                                                                                                                                                    | Page No. |
|-------------------|-------------------------------------------------------------------------------------------------------------------------------------------------------------------------------------------------------------------------------------------------------------------------------------------------------------------------------------------------------------------------------------------------------------------------------------------------------------------------------------------------------------------------------------------------------------------------------------------------------------------------------------------------------------------------------------------------------------------------------------------------------------------------------------------------------------------------------------------------------------------------------------------------------------------------------------------------------------------------------------------------------------------------------------------------------------------------------------------------------------------------------------------------------------------------------------------------------------------------------------------------------------------------------------------------------------------------------------------------------------------------------------------------------------------------------------------------------------------------|----------|
| 1. Aim            | The purpose of this community-based participatory pilot study was to explore links between health, spirituality, and wellbeing within the Métis Nation of Alberta (MNA)-Region 3.                                                                                                                                                                                                                                                                                                                                                                                                                                                                                                                                                                                                                                                                                                                                                                                                                                                                                                                                                                                                                                                                                                                                                                                                                                                                                       | 2        |
| 2. Methods        | <p><b>Patient-Oriented Research</b></p> <p>All but the first author of this manuscript are members of the MNA – Region 3. The first 2 authors met with local MNA-3 elected leaders, discussed potential research topics, and how to conduct the research. Community members, informal and elected leaders, and an Elder from the MNA-Region 3 were invited to participate in focus groups at an MNA-Region 3 mixer (a large monthly social event) in October 2018; focus groups occurred in November 2018 and January 2019. Each focus group lasted approximately 2 hours, informed consent was obtained, food was provided, and each participant received a \$50.00 gift certificate as a thank-you. During focus groups, a community member and research team member took notes, which were referred to throughout survey development. During the first focus group, participants (<math>n = 7</math>) discussed areas of interest in relation to health, spirituality, and wellbeing, and identified meaningful survey questions. At the second focus group (<math>n = 6</math>), two participants from the first focus group were absent, but two new participants attended, further discussion ensued, and a draft survey was developed. A qualitative structured survey was approved by the leadership of the MNA-Region 3 in early February 2019. See Figure 2. Data collection occurred face-to-face at two MNA-Region 3 mixers in February and March 2019.</p> | 3        |
| 3. Study results  | Surveys were completed by 29 participants, members of the MNA – Region 3, ranging in age from 28 to 80 years. The top 3 areas of interest were: (1) passing on Métis traditions and culture to younger generation (76%); (2) blending different cultural and spiritual practices (72%); and (3) cultural immersion/traditional knowledge/learning in community (66%). During co-analysis of survey data, an overarching theme of Connection and 4 corresponding themes (to Métis ancestry, to                                                                                                                                                                                                                                                                                                                                                                                                                                                                                                                                                                                                                                                                                                                                                                                                                                                                                                                                                                           | 4        |



|                               |                                                                                                                                                                                                                                                                                                                                                                                                                                                                                                                                                                                                                                                                                                                                                                                                                                                                                                                                                                                                                                                                                                                                                                                                                                                                                                                                                                                                                                                                                                                                                                                                                                                                                                                                                                                                                                                                                                                                                                                                                                                                                                                                                                                                                                                                                                                                                                           |     |
|-------------------------------|---------------------------------------------------------------------------------------------------------------------------------------------------------------------------------------------------------------------------------------------------------------------------------------------------------------------------------------------------------------------------------------------------------------------------------------------------------------------------------------------------------------------------------------------------------------------------------------------------------------------------------------------------------------------------------------------------------------------------------------------------------------------------------------------------------------------------------------------------------------------------------------------------------------------------------------------------------------------------------------------------------------------------------------------------------------------------------------------------------------------------------------------------------------------------------------------------------------------------------------------------------------------------------------------------------------------------------------------------------------------------------------------------------------------------------------------------------------------------------------------------------------------------------------------------------------------------------------------------------------------------------------------------------------------------------------------------------------------------------------------------------------------------------------------------------------------------------------------------------------------------------------------------------------------------------------------------------------------------------------------------------------------------------------------------------------------------------------------------------------------------------------------------------------------------------------------------------------------------------------------------------------------------------------------------------------------------------------------------------------------------|-----|
|                               | community, to land, and to spirituality), were identified. See Table 1.                                                                                                                                                                                                                                                                                                                                                                                                                                                                                                                                                                                                                                                                                                                                                                                                                                                                                                                                                                                                                                                                                                                                                                                                                                                                                                                                                                                                                                                                                                                                                                                                                                                                                                                                                                                                                                                                                                                                                                                                                                                                                                                                                                                                                                                                                                   |     |
| 4. Discussion and conclusions | <p>Some participants always knew they were Métis, while others discovered it later in life. There existed tension regarding choosing to reveal identity; passing as “white” had been used as a survival tactic in the past, which could contribute to decreased connection with spirituality.(22) At a two-day 2018 federal government emergency meeting regarding the high number of FNMI children in care, key causes of Métis children in care included ignorance among child welfare authorities about who Métis people are.(9) Participants described health, spirituality, and wellbeing occurring in community, and although individual and community wholeness and healing were described, so were effects of trauma, and the need to break intergenerational cycles of addiction/abuse. Participants talked about the importance of telling their stories. Managing intergenerational trauma, resultant health disparities, and ongoing structural violence requires protective buffers: (1) decolonizing strategies such as self-determination and self-governance; (2) identity formation such as cultural engagement, healing practices, and spiritual ceremonies; and (3) culturally-adapted interventions such as incorporating information on acculturation, colonization, and historical trauma.(23) On June 27, 2019, the MNA signed the first self-government agreement between a Métis nation and the Government of Canada, with a clearly-defined process to implement Métis jurisdiction in core areas of self-government.(24)</p> <p>Participants described wanting to reconnect with land and seeking reparation for wrongs done in their families and communities. The Canadian government issued Métis scrip (Halfbreed scrip), providing the appearance of Métis land entitlement, but instead facilitating wealth accumulation and western settlement (Tough and McGregor 2011). The Canadian government has moved slowly regarding land claims and reconciliation with FNMI people, and specifically for Métis title claims, which are justified and strong, there has been little action.(25) Métis people have faced discrimination due to their mixed heritage, each generation has experienced challenges, with resultant resilience, determination, and independence, and a strong, adaptable work ethic; current challenges include</p> | 7,8 |

|                                     |                                                                                                                                                                                                                                                                                                                                                                                                                                                                                                                                                                                                                                                                                                                                                                                                                                                                                                                                                                                |   |
|-------------------------------------|--------------------------------------------------------------------------------------------------------------------------------------------------------------------------------------------------------------------------------------------------------------------------------------------------------------------------------------------------------------------------------------------------------------------------------------------------------------------------------------------------------------------------------------------------------------------------------------------------------------------------------------------------------------------------------------------------------------------------------------------------------------------------------------------------------------------------------------------------------------------------------------------------------------------------------------------------------------------------------|---|
|                                     | reconnecting with Métis identity, culture, and tradition.(26) For Métis people, moving forward toward healing and wellbeing includes recognition of the intergenerational effects of trauma, and the essential place of family and community.                                                                                                                                                                                                                                                                                                                                                                                                                                                                                                                                                                                                                                                                                                                                  |   |
| 5. Reflections/critical perspective | Lessons learned in our patient-oriented community-based pilot study included the following. Participants in our pilot study described the importance of telling their stories, of sharing who they are, and persisting in pursuing wellbeing for themselves and their communities. Engaging the MNA – Region 3 community in co-developing, distributing, and analysing a qualitative structured survey presented opportunity for: (1) Increased individual and community knowledge Métis identity/ancestry and health, spirituality, and wellbeing; (2) increased research capacity within the MNA – Region 3; (3) increased collaboration in community-led identification of priorities for community-initiated funding and policy development; and (4) contributing to increased individual, family, and community wellbeing within the MNA – Region 3 and beyond. We recommend engaging in Métis-guided community-based research across the remaining 5 regions in the MNA. | 9 |
